# Supplementary material for: Therapeutic targeting de novo purine biosynthesis driven by β-catenin-dependent PPAT upregulation in hepatoblastoma
Source: Springer Nature journal article supplement (doi:10.1038/s41419-025-07502-6), 2025-03-17
Supplement: MOESM1 [file 41419_2025_7502_MOESM1_ESM.pdf]

**Figure S1. The *de novo* purine biosynthesis pathway is upregulated in HB and is associated with poor prognosis.**

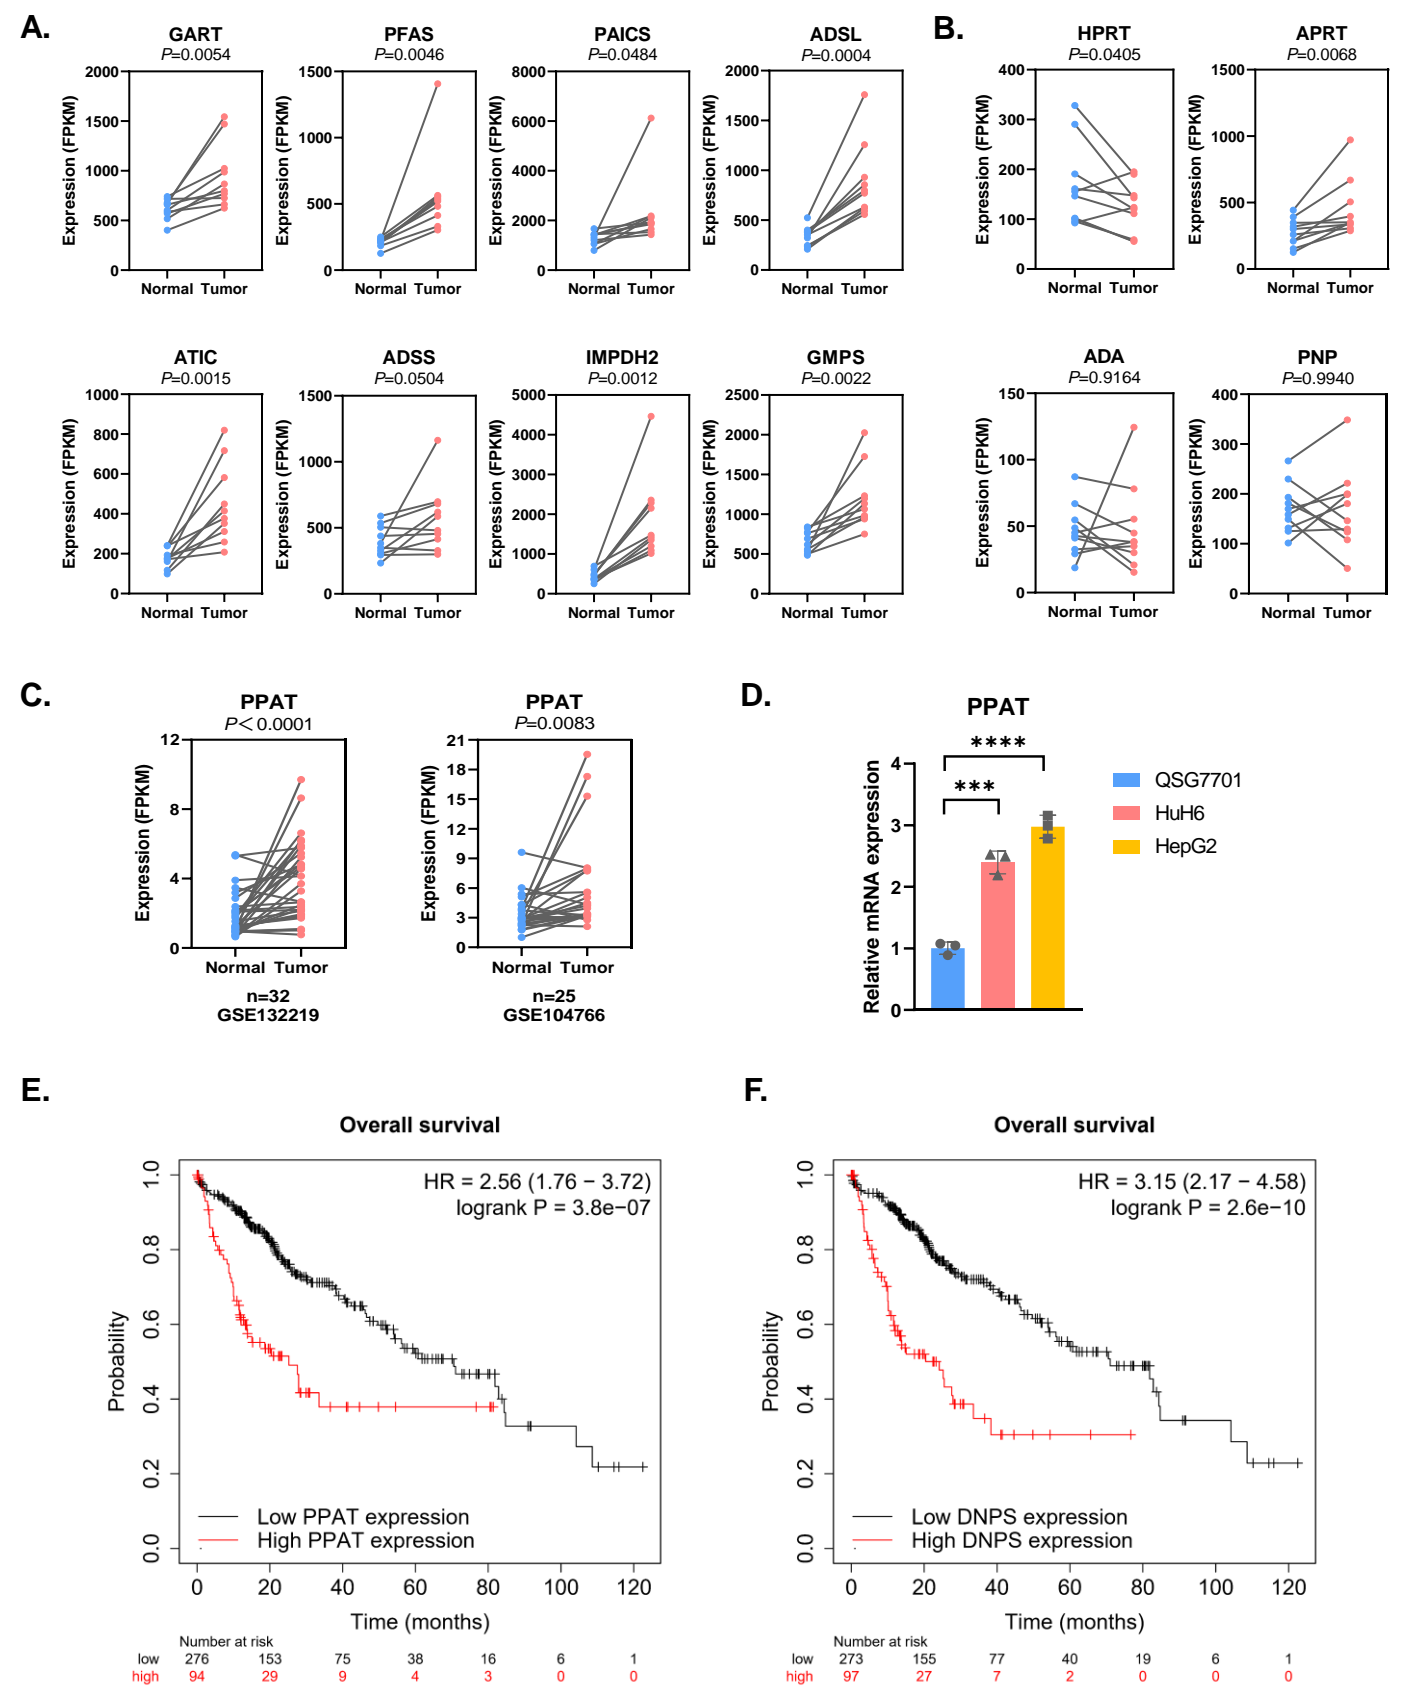

**Figure S1. The *de novo* purine biosynthesis pathway is upregulated in HB and is associated with poor prognosis.**

**Figure S1. The *de novo* purine biosynthesis pathway is upregulated in HB and is associated with poor prognosis.**

- (A) mRNA levels of genes involved in the *de novo* purine biosynthesis pathway in 10 pairs of HB and normal tissue as determined by RNA-Seq.
- (B) RNA levels of genes involved in salvage purine biosynthesis pathway in 10 pairs of HB and normal tissues as determined by RNA-Seq.
- (C) mRNA levels of PPAT in two independent public datasets.
- (D) Relative mRNA levels of PPAT in normal liver cells (QSG7701) and HB cells (HuH6 and HepG2) determined by RT-qPCR (unpaired t-test).
- (E) Kaplan-Meier plots for overall survival in public liver cancer datasets. Red, high expression of PPAT; black, low expression of PPAT; HR, hazard ratio.
- (F) Kaplan-Meier plots for overall survival in public liver cancer datasets. Red, high expression of 6 DNPS genes (PPAT, GART, PFAS, PAICS, ADSL and ATIC); black, low expression of 6 DNPS genes; HR, hazard ratio.

**Figure S2. PPAT is essential for HB cell proliferation.**

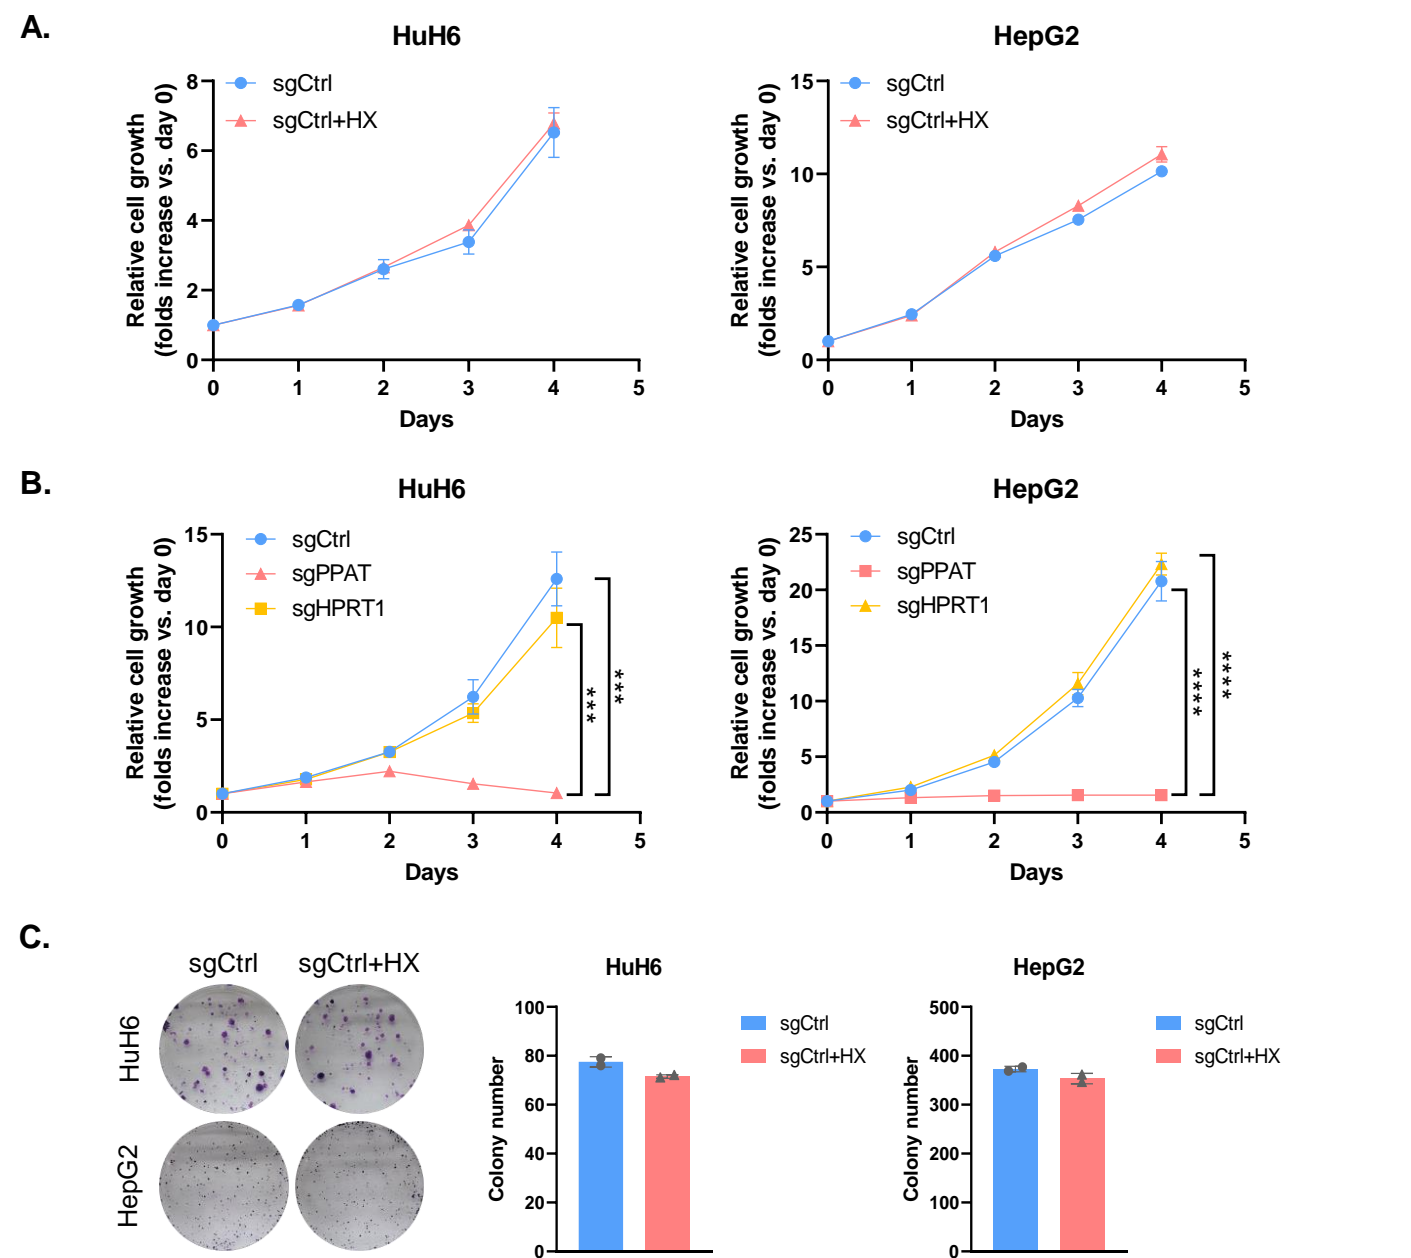

**Figure S2. PPAT is essential for HB cell proliferation.**

(A) Growth curves were generated for non-targeting control knockout HuH6 or HepG2 cells with or without supplementation of 100  $\mu$ M HX. Each point was assayed in hexaplicates.

(B) Growth curves were generated for non-targeting control, PPAT knockout and HPRT1 knockout HuH6 or HepG2 cells. Each point was assayed in triplicates (unpaired t test).

(C) Non-targeting control knockout HuH6 or HepG2 cells with or without supplementation of 100  $\mu$ M HX, were subjected to colony formation assay (left), quantification data (right).

**Figure S3. PPAT knockout leads to HB cell cycle arrest, apoptosis and impairment of migration capability.**

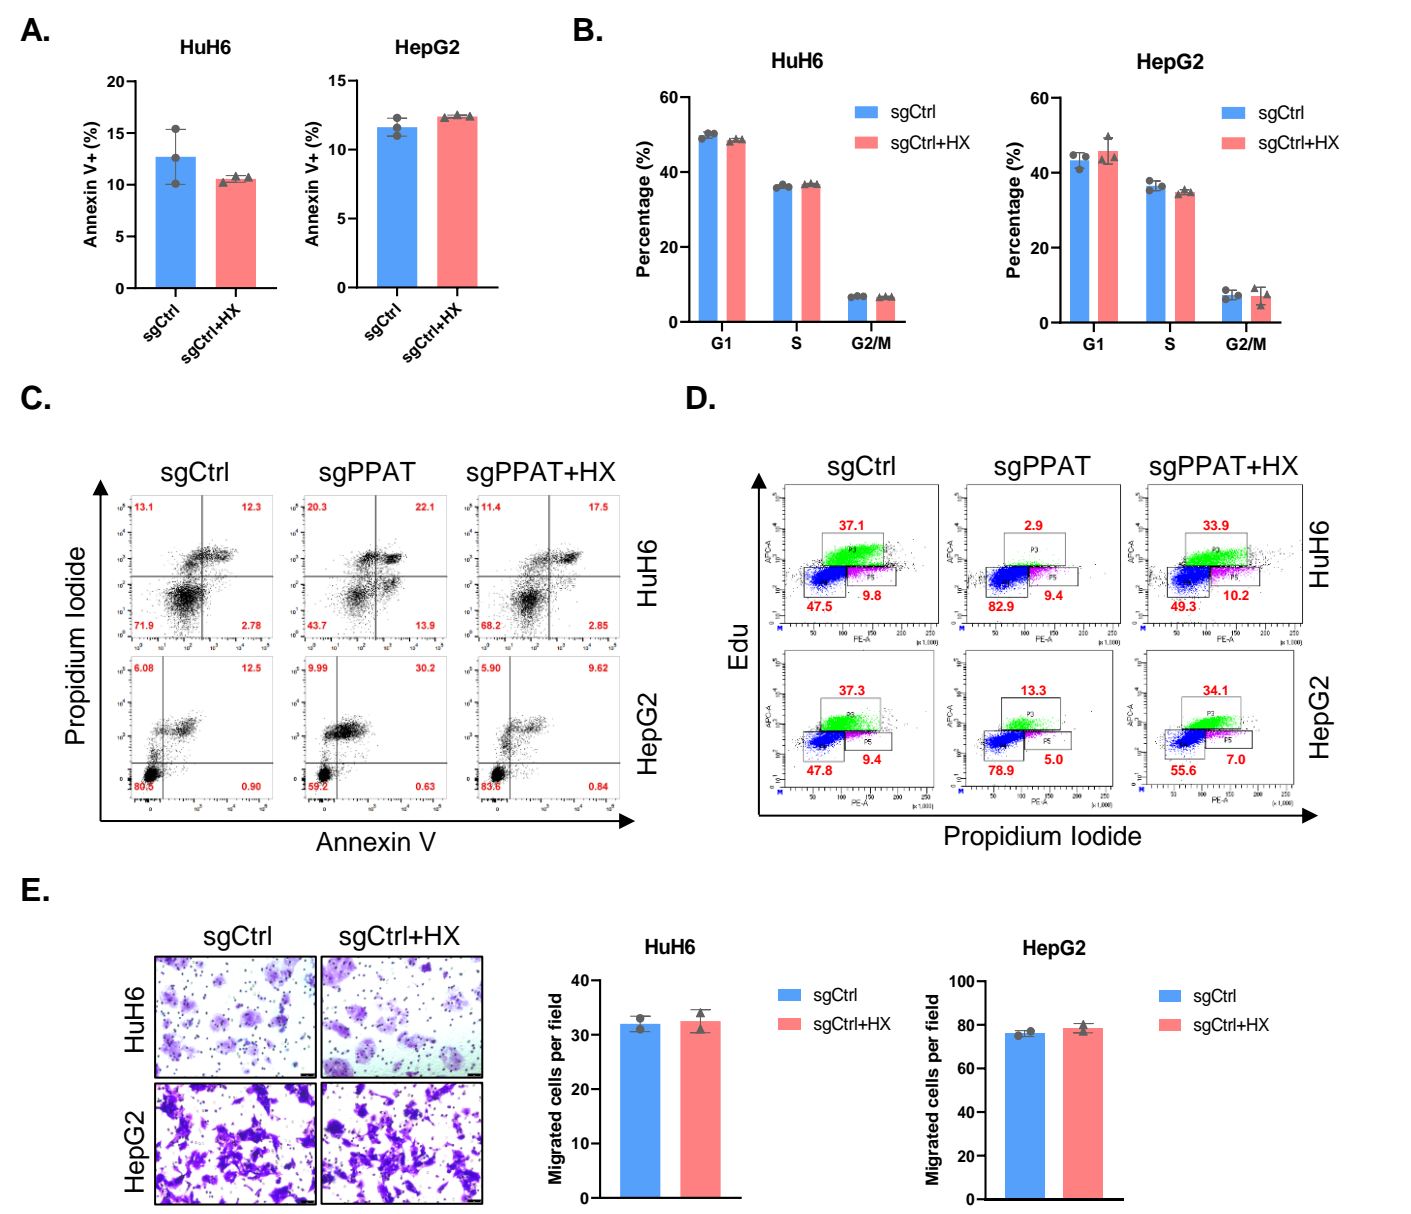

**Figure S3. PPAT knockout leads to HB cell cycle arrest, apoptosis and impairment of migration capability.**

(A-B) Quantification data of apoptosis (A) and cell cycle (B) analysis of non-targeting control knockout HuH6 or HepG2 cells with or without supplementation of 100  $\mu$ M HX based on flow cytometric analysis.

(C-D) Representative image of apoptosis (D) and cell cycle (E) analysis of non-targeting control and PPAT knockout HuH6 or HepG2 cells with or without supplementation of 100  $\mu$ M HX based on flow cytometric analysis.

(E) Non-targeting control knockout HuH6 or HepG2 cells with or without supplementation of 100  $\mu$ M HX were subjected to migration assay (left) and the results were quantified (right).

**Figure S4. The expression of  $\beta$ -catenin and PPAT is strongly correlated in HB.**

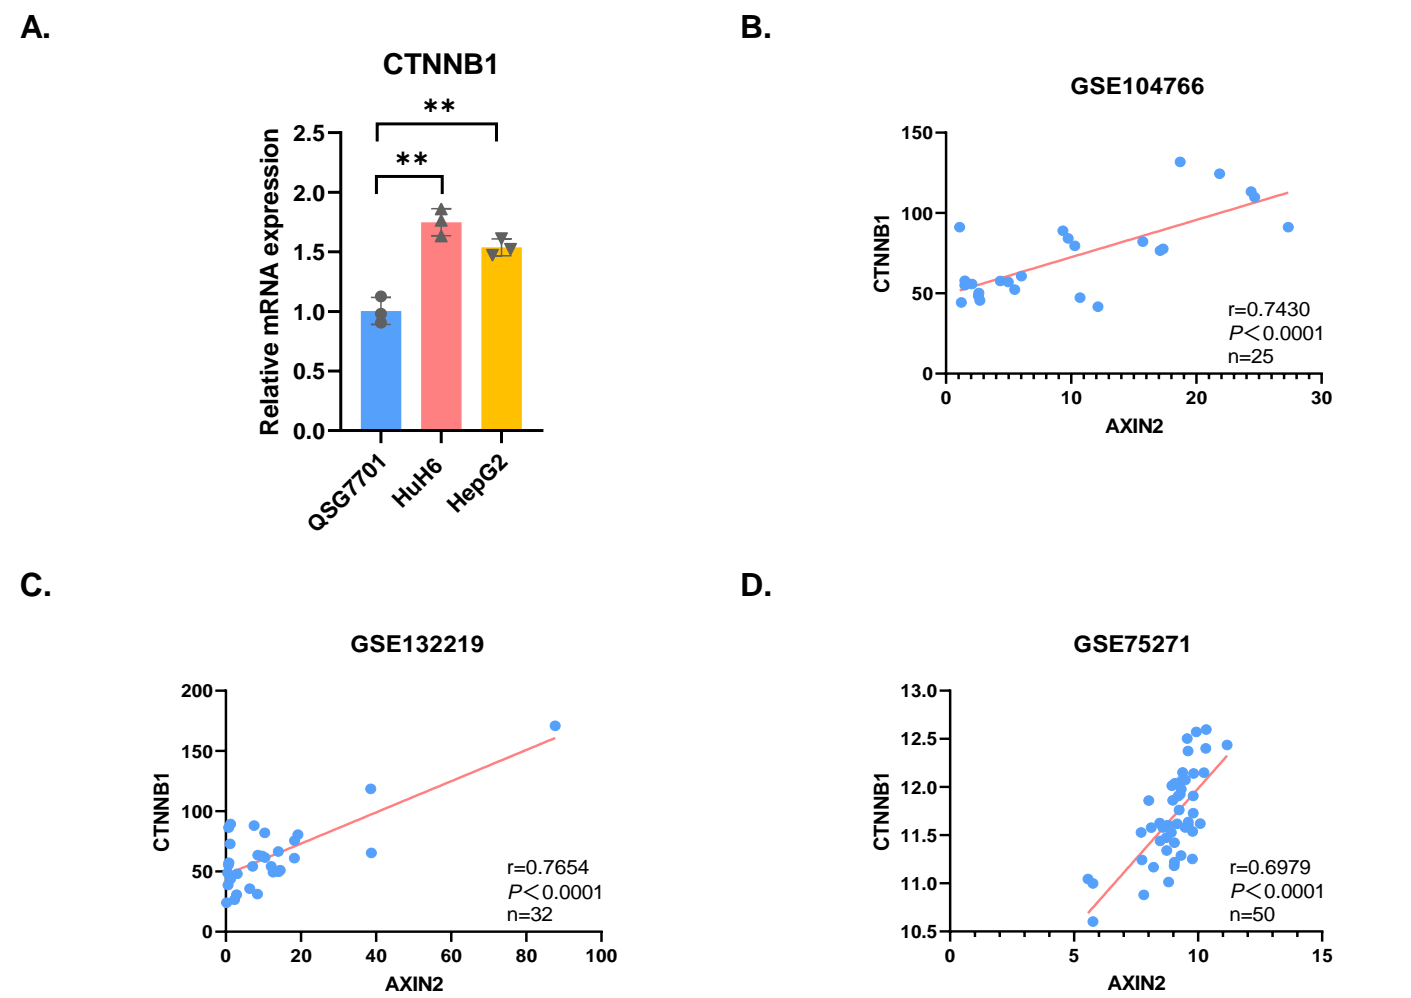

**Figure S4. The expression of  $\beta$ -catenin and PPAT is strongly correlated in HB.**

(A) Relative mRNA levels of *CTNNB1* in normal liver cells (QSG7701) and HB cells (HuH6 and HepG2) were determined by RT-qPCR (unpaired t-test).

(B-D) Scatter plots revealed a positive correlation between *AXIN2* and *CTNNB1* expression in HB tissues. Data were from three independent published datasets. The linear best fit lines were shown. The Pearson correlation coefficient ( $r$ ) and p-values ( $P$ ) were obtained from two-tailed t-test.

**Figure S5.  $\beta$ -catenin transcriptionally activates PPAT expression and regulates *de novo* purine biosynthesis activity.**

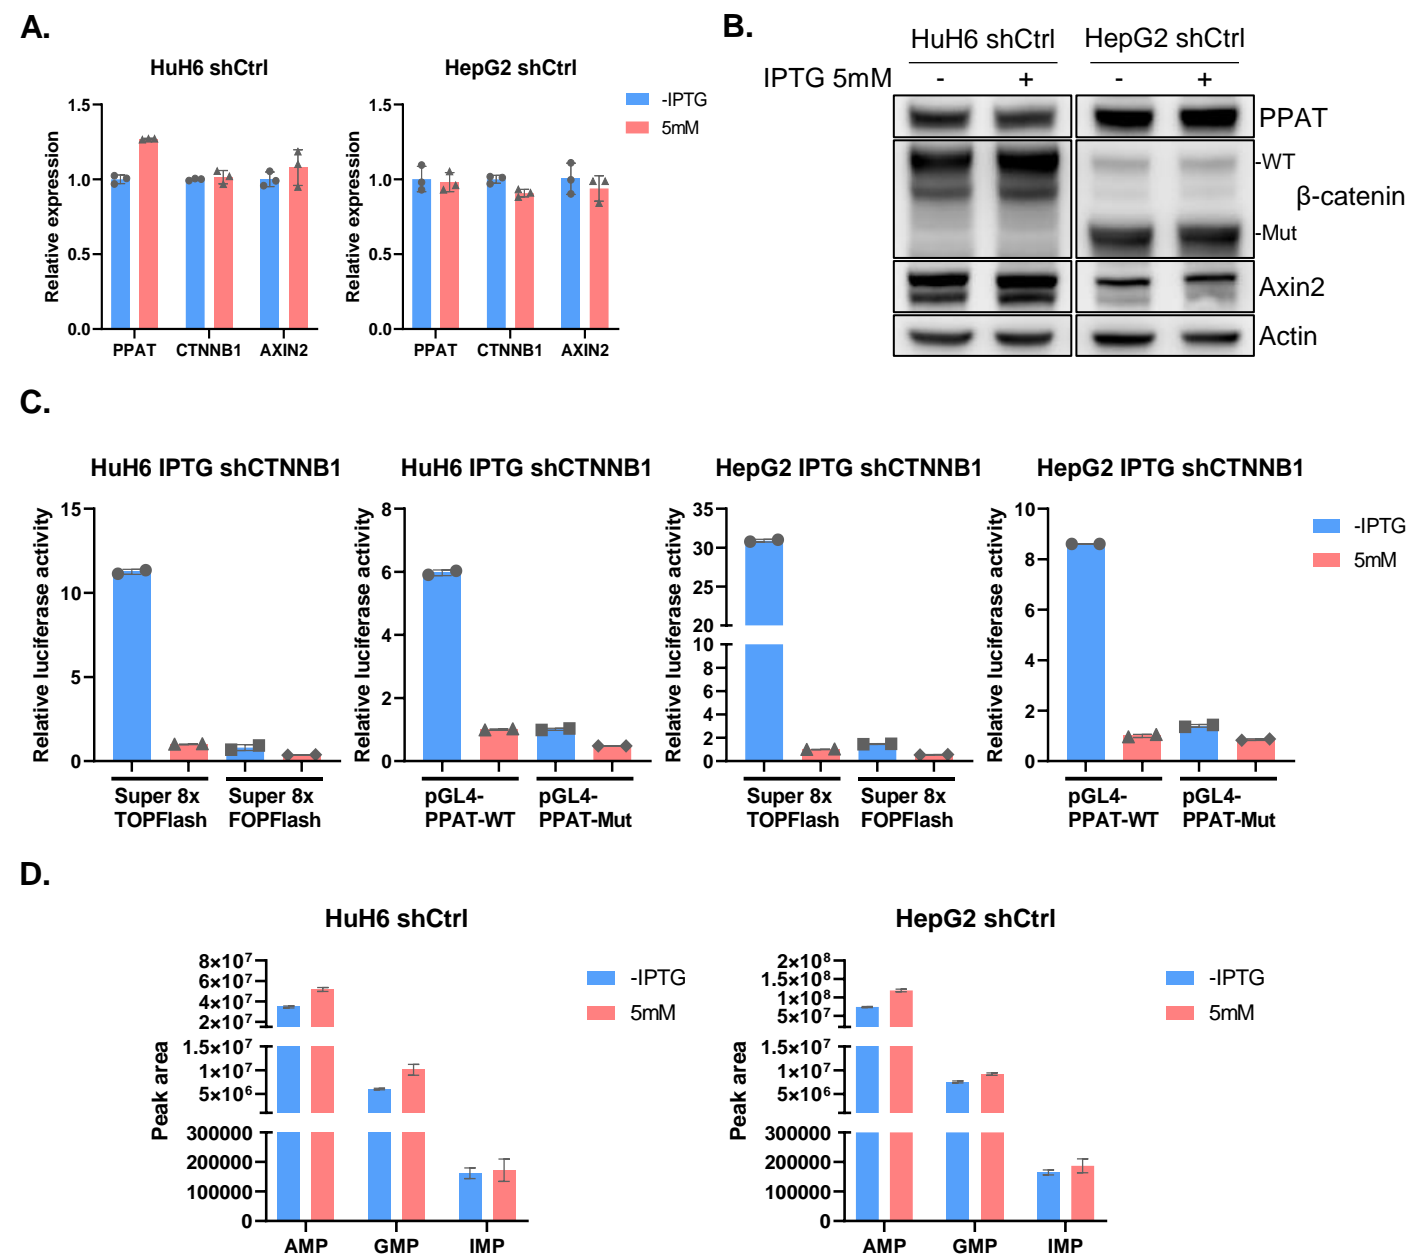

**Figure S5.  $\beta$ -catenin transcriptionally activates PPAT expression and regulates *de novo* purine biosynthesis activity.**

(A-B) The relative mRNA (A) and protein (B) levels of PPAT,  $\beta$ -catenin and Axin2 in inducible non-targeting control knockdown cells with or without IPTG treatment (5 mM) for 4 days were determined by RT-qPCR or WB analyses.

(C) Either Super 8x TOPFlash and FOPFlash (TOPFlash mutant) or luciferase reporter constructs harboring WT and mutant *PPAT* promoter sequence were transfected into inducible  $\beta$ -catenin knockdown HuH6 or HepG2 cells with or without IPTG treatment (5mM) for 4 days, followed by the determination of luciferase activity.

(D) Relative levels of AMP, GMP and IMP in inducible non-targeting control knockdown cells with or without IPTG treatment (5mM) for 4 days were determined by LC-MS

**Figure S6. LTX inhibits  $\beta$ -catenin mutant HB tumor growth.**

**A.**

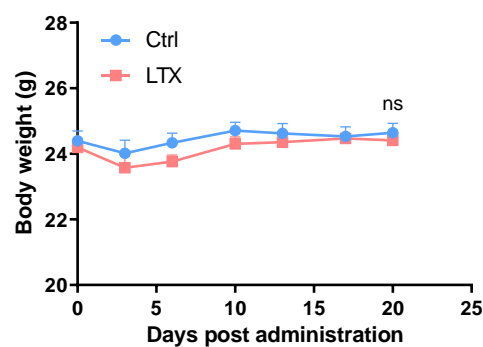

**B.**

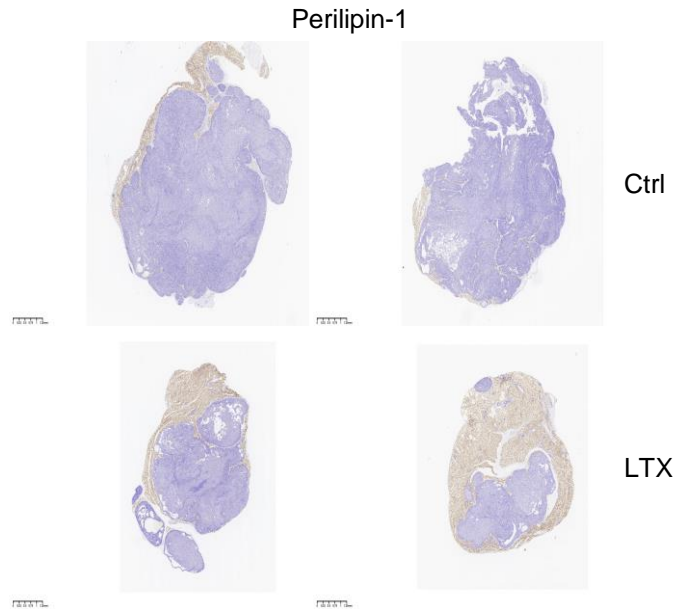

**Figure S6. LTX inhibits  $\beta$ -catenin mutant HB tumor growth.**

(A) The body weight at the indicated time of the *in vivo* LTX treatment (40 mg/kg) experiment (unpaired t-test).

(B) Perilipin-1 staining of tumor tissues depicted in figure 7G.
